# Supplementary material for: Annexin A1 Deficiency does not Affect Myofiber Repair but Delays Regeneration of Injured Muscles
Source: PubMed Central journal article supplement (PMC4678367; doi:10.1038/srep18246), 2015-12-15
Supplement: srep18246-s1.pdf [file srep18246-s1.pdf]

## **ANNEXIN A1 DEFICIENCY IN VIVO DOES NOT AFFECT MYOFIBER REPAIR BUT DELAYS REGENERATION OF INJURED MUSCLES**

Evgenia Leikina<sup>1\*</sup>, Aurelia Defour<sup>2\*</sup>, Kamran Melikov<sup>1</sup>, Jack H. Van der Meulen<sup>2</sup>, Kanneboyina Nagaraju<sup>2,4</sup>, Shivaprasad Bhuvanendran<sup>2</sup>, Claudia Gebert<sup>3</sup>, Karl Pfeifer<sup>3</sup>, Leonid V. Chernomordik<sup>1#</sup>, Jyoti K. Jaiswal<sup>2,4#</sup>

<sup>1</sup> Section on Membrane Biology, Program of Physical Biology, Eunice Kennedy Shriver National Institute of Child Health and Human Development, National Institutes of Health, Bldg. 10/Rm. 10D05, 10 Center Dr. Bethesda, Maryland 20892-1855, USA;

<sup>2</sup> Children's National Medical Center, Center for Genetic Medicine Research, 111 Michigan Avenue, NW, Washington DC 20010-2970, USA

<sup>3</sup> Section on Genome Imprinting, Program on Genomics of Differentiation, Eunice Kennedy Shriver National Institute of Child Health and Human Development, National Institutes of Health, USA;

<sup>4</sup> Department of Integrative Systems Biology, George Washington University School of Medicine and Health Sciences, Washington DC, USA

\* These authors made *equal contributions* to the work.

**#Correspondence to:** Dr. Leonid V. Chernomordik, e-mail: [chernoml@mail.nih.gov](mailto:chernoml@mail.nih.gov) or Dr. Jyoti K. Jaiswal, email: [jkjaiswal@cnmc.org](mailto:jkjaiswal@cnmc.org)

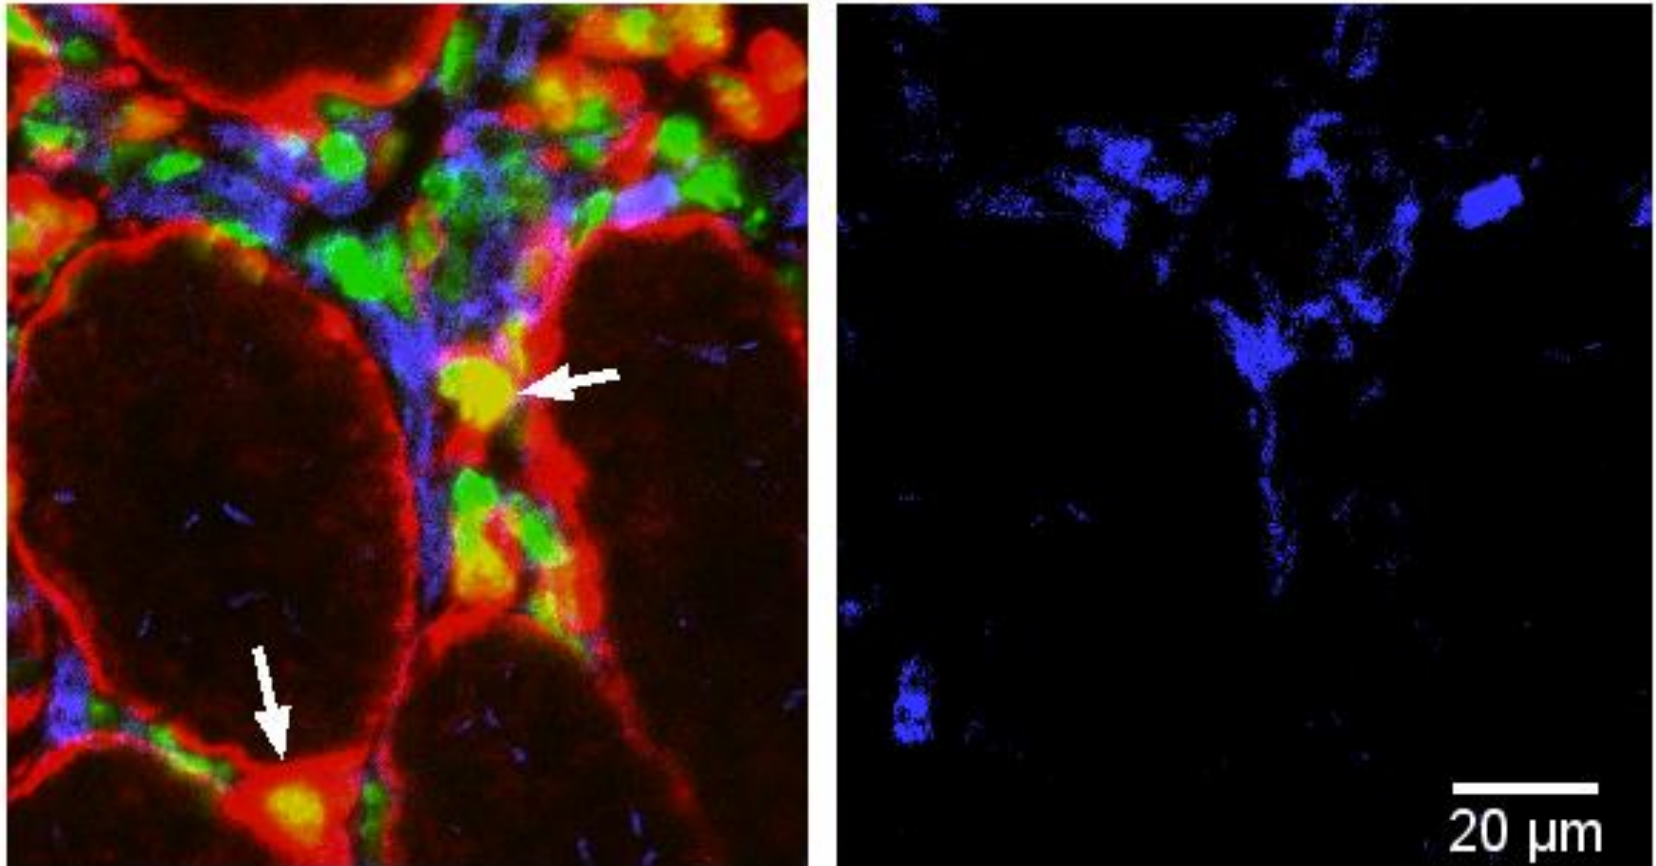

Supplementary Figure 1. Macrophages in the unregenerated regions detected by macrophage F4/80 antibody (blue) are not recognized by desmin antibody (red) and BrdU-antibody (green) arguing against significant contribution of macrophages to the population of desmin-labeled cells. Arrows show desmin-positive, BrdU-positive cells that are not labeled by F4/80. Unregenerated region of the muscle section of w.t. mouse at the 3<sup>rd</sup> day post-injury. Scale bar 20 $\mu$ m.

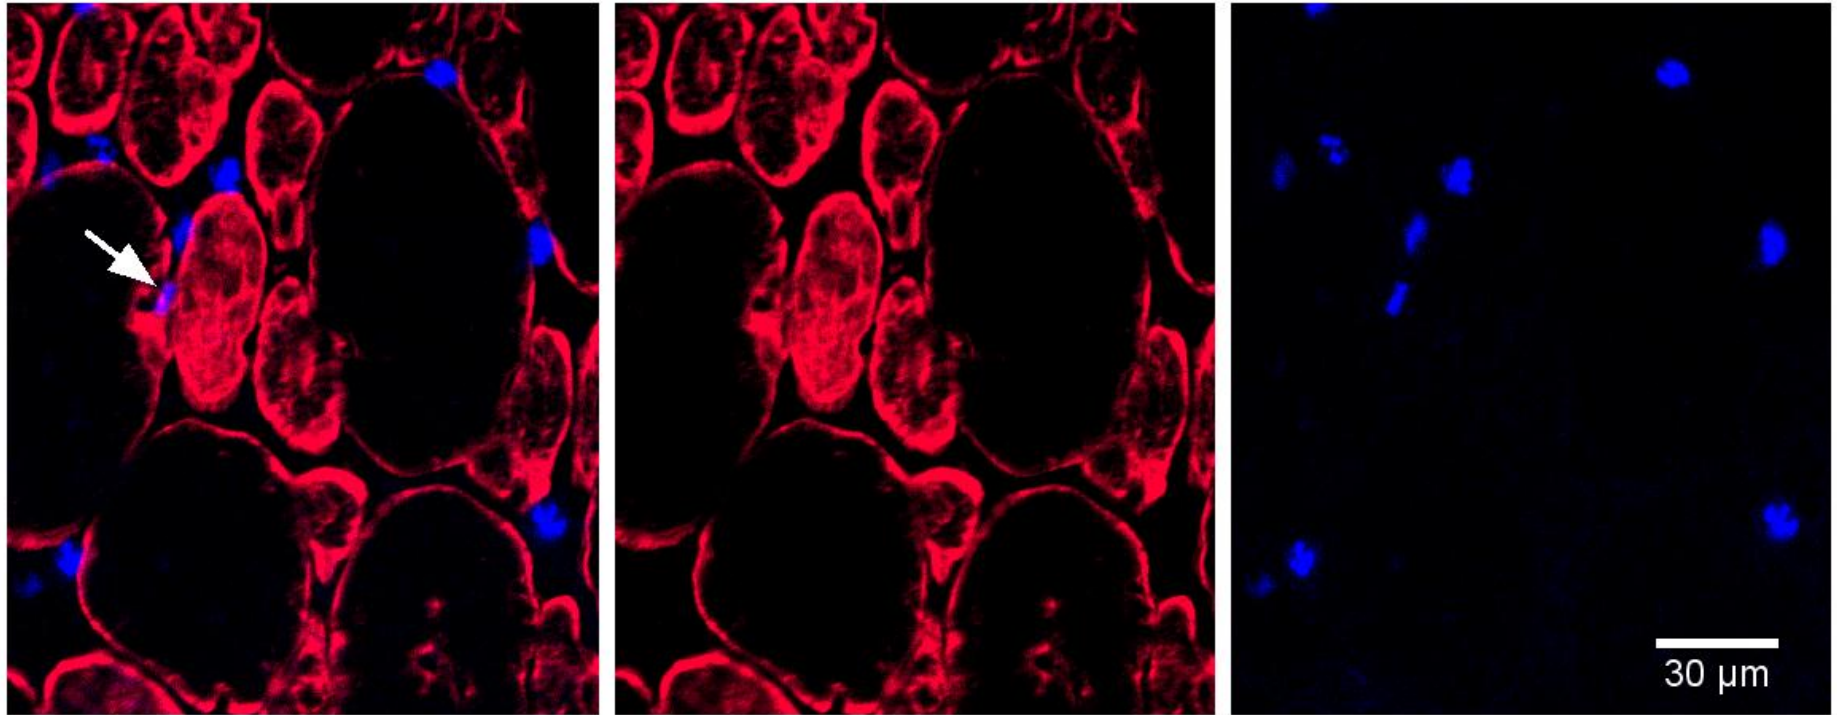

Supplementary Figure 2. Muscle section from w.t. mice taken 5 days after injury labeled with two markers of myogenic regeneration: Myf5 antibodies (blue) and desmin antibodies (red). Arrow marks desmin-positive Myf5-positive cell. Scale bar 30 $\mu$ m.

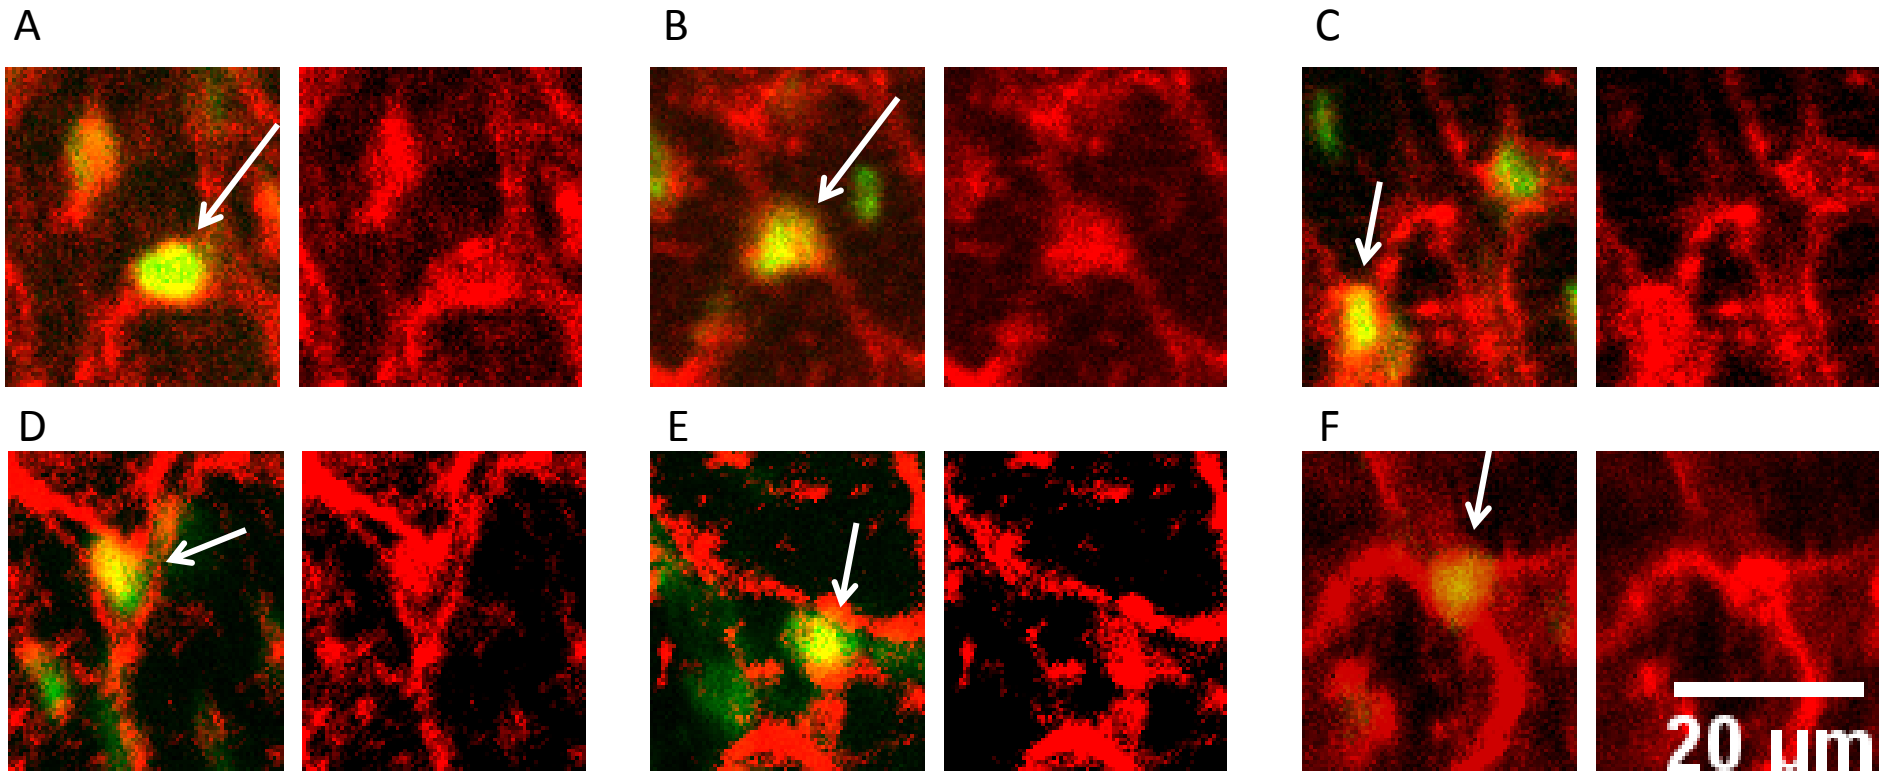

Supplementary Figure 3. Identification of unfused myoblasts (marked by arrows) as mononucleated desmin-positive (red), BrdU-positive (green) cells located at the surface of myofibers. All 6 examples are taken from regenerating regions of the muscle sections from w.t. mice 5 days after injury. Scale bar 20 $\mu$ m.
